# Supplementary material for: Obatoclax impairs lysosomal function to block autophagy in cisplatin-sensitive and -resistant esophageal cancer cells
Source: PubMed Central journal article supplement (PMC4924745; doi:10.18632/oncotarget.7492), 2016-02-19
Supplement: oncotarget-07-14693-s001.pdf [file oncotarget-07-14693-s001.pdf]

## Obatoclax impairs lysosomal function to block autophagy in cisplatin-sensitive and -resistant esophageal cancer cells

### Supplementary Materials

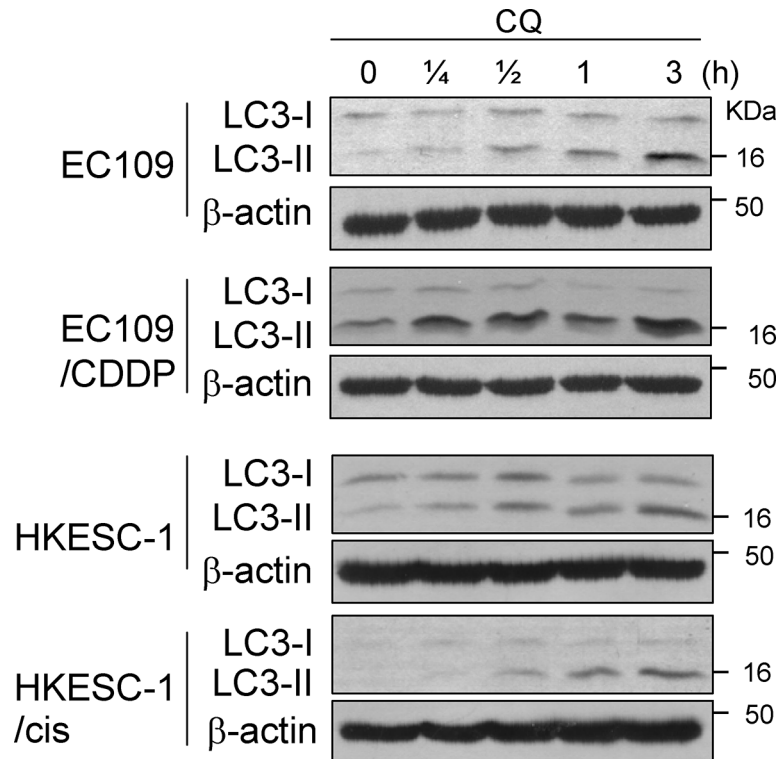

**Supplementary Figure S1 (Related to Figure 3C): Chloroquine increased LC3-II expression.** Cells were treated with 50  $\mu$ M chloroquine (CQ) for the indicated time periods. The conversion of LC3-I to LC3-II was determined by Western blot analysis. Blots were representative of 3 independent experiments.

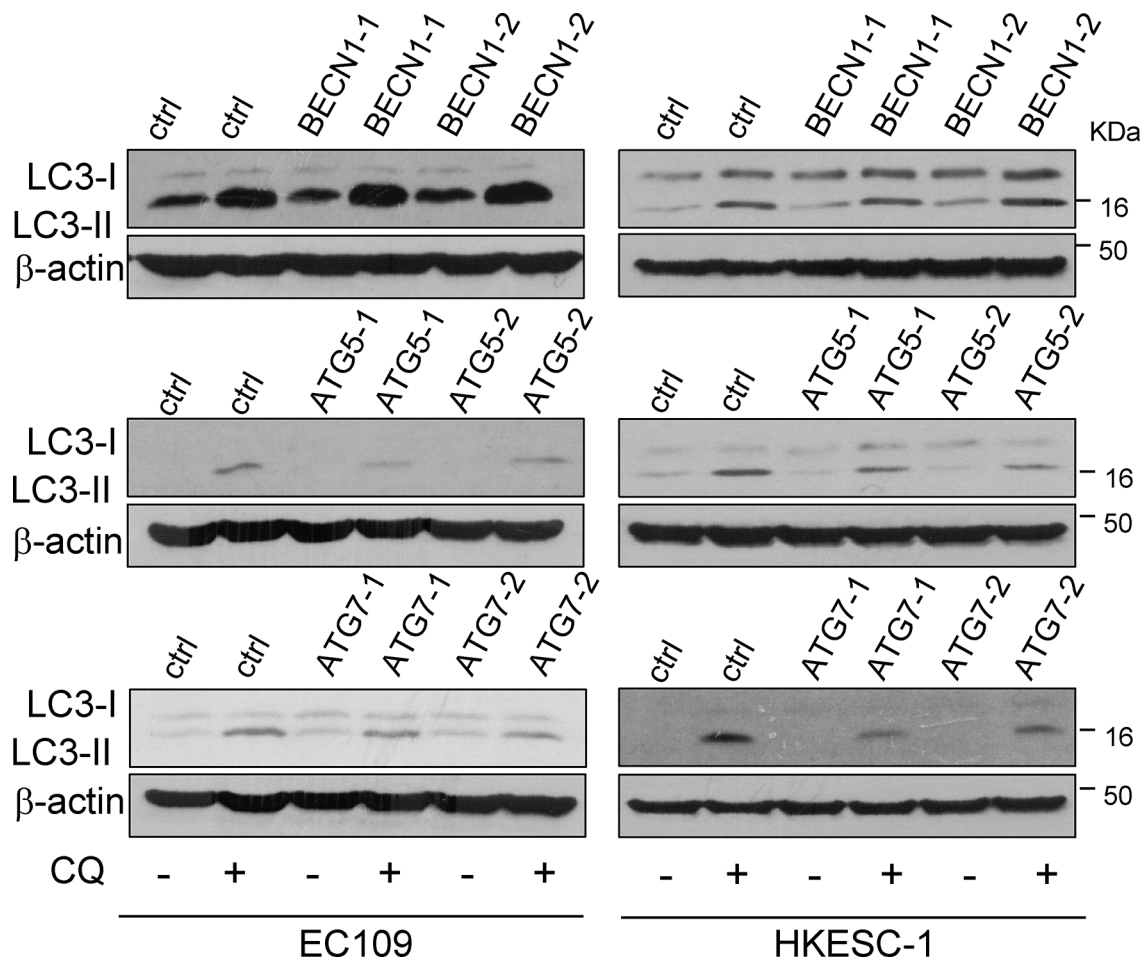

**Supplementary Figure S2 (Related to Figure 5B): Effects of siRNA-mediated knockdown of Beclin-1, ATG5, or ATG7 on chloroquine-induced LC3-II accumulation.** After transfection with the control siRNA, Beclin-1 siRNA, ATG5 siRNA, or ATG7 siRNA, cells were treated with obatoclax at the concentration of 0.25  $\mu$ M (EC109 cells) and 0.125  $\mu$ M (HKESC-1 cells) for 3 h. The conversion of LC3-I to LC3-II was determined by Western blot analysis.  $\beta$ -actin was used to evaluate protein loading. Blots were representative of 3 independent experiments.

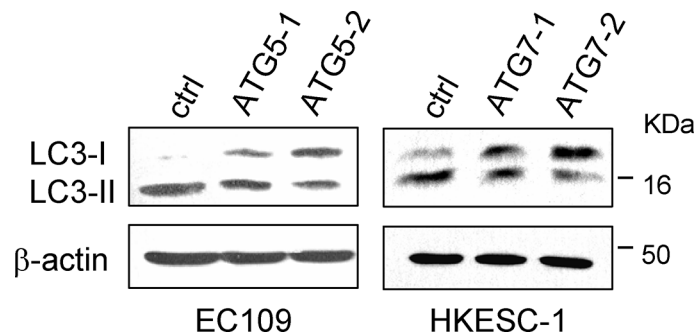

**Supplementary Figure S3 (Related to Figure 5B): Downregulation of ATG5 or ATG7 decreased basal LC3-II expression.** After transfection with the control siRNA, ATG5 siRNA or ATG7 siRNA, cells were collected. The conversion of LC3-I to LC3-II was determined by Western blot analysis.  $\beta$ -actin was used to evaluate protein loading. Blots were representative of 3 independent experiments.

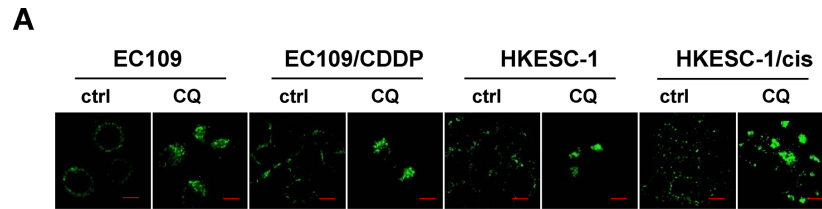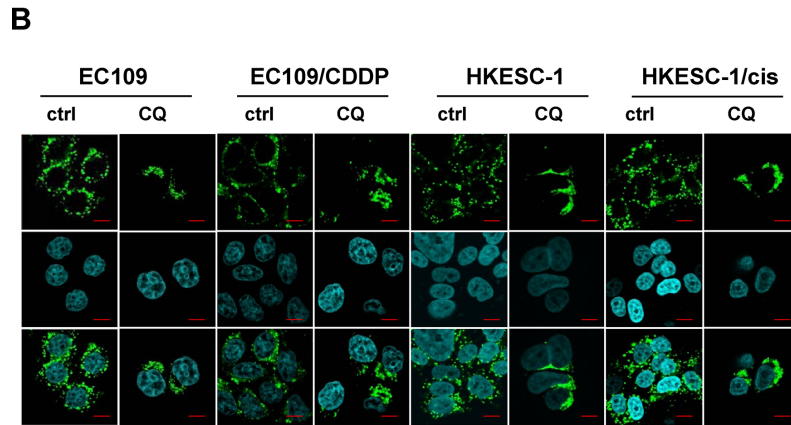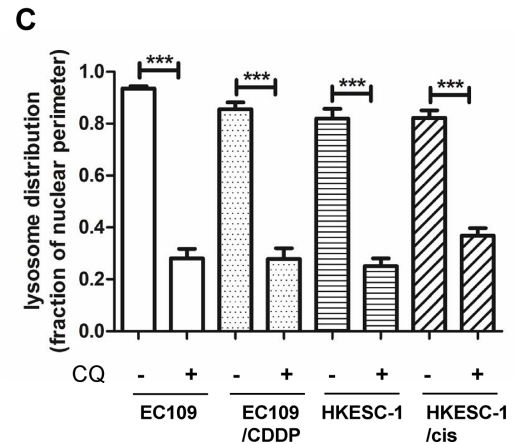

**Supplementary Figure S4 (Related to Figure 6): Chloroquine induced lysosome clustering.** (A) Cells were treated with 50  $\mu$ M chloroquine (CQ) for 3 h. Lysosomes in live cells were stained with LysoGreen Indicator reagent. Scale bars, 10  $\mu$ m. (B) Cells were treated with 50  $\mu$ M CQ for 3 h. Immunofluorescent staining for LAMP1 marked lysosomes. The results shown are representative images. Scale bars, 10  $\mu$ m. (C) Quantification of lysosome distribution (lysosome distribution relative to nuclear perimeter) is shown. For each point, at least 30 cells were pooled from three independent experiments. \*\*\* $P < 0.001$  as compared with control cells.

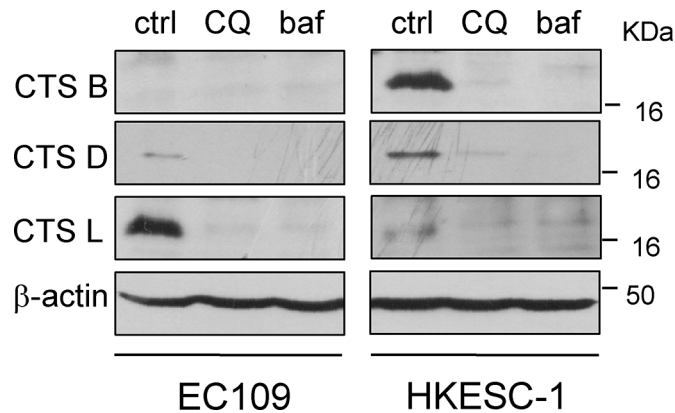

**Supplementary Figure S5 (Related to Figure 7A): Effects of lysosomotropic agents chloroquine and bafilomycin A1 on protein levels of cathepsin B (CTSB), cathepsin D (CTSD), or cathepsin L (CTSL).** Cells were treated with chloroquine (50  $\mu$ M) or bafilomycin A1 (10 nM) for 48 h. The mature CTSB, D and L expression was determined by Western blot analysis. Blots were representative of 3 independent experiments.
